# Supplementary material for: Evaluation of New Technology-Based Tools for Dietary Intake Assessment—An ILSI Europe Dietary Intake and Exposure Task Force Evaluation
Source: PubMed Central journal article supplement (PMC6356426; doi:10.3390/nu11010055), 2018-12-28
Supplement: nutrients-11-00055-s001.pdf [file nutrients-11-00055-s001.pdf]

## Supplementary Materials

**Table S1.** Search strategies used to identify technology-based tools for dietary intake assessment

| Search 1 <sup>1,2</sup> | Search Terms (number of results) <sup>1</sup>                                                                                                                                                                                                                                                                                                                                                                                                                                                                                                                                                                                                                                                                                                                                                                                                                                                  |
|-------------------------|------------------------------------------------------------------------------------------------------------------------------------------------------------------------------------------------------------------------------------------------------------------------------------------------------------------------------------------------------------------------------------------------------------------------------------------------------------------------------------------------------------------------------------------------------------------------------------------------------------------------------------------------------------------------------------------------------------------------------------------------------------------------------------------------------------------------------------------------------------------------------------------------|
| PubMed                  | <p>Application + dietary assessment + electronic (26)</p> <p>Application + dietary assessment + software (18)</p> <p>Personal digital assistant + food record (19)</p> <p>Dietary assessment + software + tools (148) current search</p> <p>Application + dietary assessment + dietary intake (83)</p> <p>Application + nutrition + technology (141)</p> <p>Application + dietary intake (290)</p> <p>Application + nutrition assessment + software (19)</p> <p>Mobile application + dietary assessment (20)</p> <p>Application + personal digital assistant + nutrition (8)</p> <p>Application + dietary intake + web (13)</p>                                                                                                                                                                                                                                                                |
| PLOS                    | <p>Application + dietary assessment + electronic + software + mobile (470)</p> <p>Application + nutrition assessment tool + software + food record + health + technology + management + mobile (140)</p> <p>Application + nutritional assessment + dietary assessment + software + mobile + personal (339)</p> <p>Application + dietary assessment + management + chronic disease + software + mobile (512)</p>                                                                                                                                                                                                                                                                                                                                                                                                                                                                                |
| BioMED                  | <p>'Application + nutritional assessment + electronic + software + mobile' (103)</p> <p>'Application + dietary assessment + dietary intake + software + mobile' (88)</p>                                                                                                                                                                                                                                                                                                                                                                                                                                                                                                                                                                                                                                                                                                                       |
| Science Direct          | <p>nutritional assessment + software + apps (208)</p> <p>Application + dietary assessment + dietary intake + software + mobile (501)</p>                                                                                                                                                                                                                                                                                                                                                                                                                                                                                                                                                                                                                                                                                                                                                       |
| Search 2 <sup>1,3</sup> |                                                                                                                                                                                                                                                                                                                                                                                                                                                                                                                                                                                                                                                                                                                                                                                                                                                                                                |
| OVID                    | <ol style="list-style-type: none"> <li>1. exp nutrition assessment/ (8916)</li> <li>2. Nutrition surveys/ or diet surveys (11488)</li> <li>3. Diet records/ (4291)</li> <li>4. (diet* adj2 (recall* or questionnaire* or history* or instrument*)),tw. (5582)</li> <li>5. (nutrition* adj2 (survey* or assess* or instrument*)),tw. (14782)</li> <li>6. (food adj2 (questionnaire* or record* or recall* or diar* or checklist* or screener*)),tw. (11389)</li> <li>7. 1 or 2 or 3 or 4 or 5 or 6 (40952)</li> <li>8. exp internet/ (64354)</li> <li>9. technolog*.tw. (251969)</li> <li>10. web.tw. (59263)</li> <li>11. online.tw. (51470)</li> <li>12. (mobile adj2 app*).tw. (1540)</li> <li>13. tool*.tw. (411302)</li> <li>14. 8 or 9 or 10 or 11 or 12 or 13 (743498)</li> <li>15. 7 and 14 (2938)</li> <li>16. limit 15 to (english language and yr="2011 -Current") (1615)</li> </ol> |
| Search 3 <sup>1,3</sup> |                                                                                                                                                                                                                                                                                                                                                                                                                                                                                                                                                                                                                                                                                                                                                                                                                                                                                                |
| OVID                    | Nutrition assessment plus diet* intake OR food intake plus valid*                                                                                                                                                                                                                                                                                                                                                                                                                                                                                                                                                                                                                                                                                                                                                                                                                              |

|  |                                                             |
|--|-------------------------------------------------------------|
|  | Excluding references included in previous OVID search (134) |
|--|-------------------------------------------------------------|

<sup>1</sup> Inclusion criteria: English language publications

<sup>2</sup> Search conducted 1 August 2016 and included articles from 16 September 2011 to 31 July 2016.

<sup>3</sup> Search conducted 12 September 2017 and included articles from 1 January 2011 to 12 September 2017.

**Table S2.** Details of data extraction and evaluation criteria used to evaluate new technology tools for dietary intake assessment <sup>1</sup>

| Category                                   | Attribute                                        | Data capture                                                                                                                                      |
|--------------------------------------------|--------------------------------------------------|---------------------------------------------------------------------------------------------------------------------------------------------------|
| GENERAL ATTRIBUTES                         | Device name                                      | Tool name                                                                                                                                         |
|                                            | Location                                         | Tool designed for use in which country or countries                                                                                               |
|                                            | Main purpose of the tool                         | Dietary intake; Dietary intake and physical activity; Medical management                                                                          |
|                                            | Target audience                                  | Ages and attributes                                                                                                                               |
|                                            | Context                                          | Research/surveillance; consumer                                                                                                                   |
|                                            | Main platform of the tool                        | Web-based; Smartphone; wearable; Stand-alone personal computer (PC); multiple; PDA                                                                |
|                                            | Type of data collected                           | Food record/recall; FFQ; Other                                                                                                                    |
| DATA ENTRY                                 | Text                                             | Subject enters data as text; interviewer or dietitian enters text data from participant; no text entry                                            |
|                                            | Photo                                            | Self-recording via image capture (yes, no, not specified)                                                                                         |
|                                            | Barcode                                          | Data entry by bar-code scanner (yes, no, not specified)                                                                                           |
|                                            | Health characteristics                           | Subject can record health characteristics, e.g. height, weight, age, medical measurements, etc. (yes, no, not specified)                          |
|                                            | Physical activity                                | Subject can monitor their physical activity (yes with automated data transfer from another device, yes with manual data entry, no, not specified) |
|                                            | Set personal goals                               | Subject can set personal goals (yes, no, not specified)                                                                                           |
| IDENTIFICATION and QUANTIFICATION of FOODS | Automated identification                         | Tool could automatically identify foods from images                                                                                               |
|                                            | Manual identification of foods                   | Subject or dietitian manually selected food items                                                                                                 |
|                                            | Comprehensive national food composition database | Name of database and number of food items                                                                                                         |
|                                            | Intakes quantified by weights/household measures | Yes, no, not specified                                                                                                                            |
|                                            | Intakes estimated from digital images            | Automatically, manually, or standards amounts assigned from images of portions of different size                                                  |
| CUSTOMIZATION                              | Ability to add missing foods                     | Yes, no, not specified                                                                                                                            |

|                        |                                       |                                                                                                      |
|------------------------|---------------------------------------|------------------------------------------------------------------------------------------------------|
|                        | Ability to add custom recipes         | Yes, no, not specified                                                                               |
|                        | Ability to record dietary supplements | Yes, no, not specified                                                                               |
|                        | Learning system adapts food list      | Yes, no, not specified                                                                               |
| OUTPUT                 | Energy                                | Yes, no, not specified                                                                               |
|                        | Macronutrients                        | Yes, no, not specified                                                                               |
|                        | Micronutrients                        | Yes with extensive list, yes with limited list, no, not specified                                    |
|                        | Food groups                           | Yes, no, not specified                                                                               |
|                        | Time of intake                        | Yes, no, not specified                                                                               |
|                        | Meal name                             | Yes, no, not specified                                                                               |
|                        | Automated reports generated           | Feedback to participants available from automated reports; feedback from manual reports; no feedback |
| USABILITY and VALIDITY | Usability feedback collected          | Yes, no, not specified                                                                               |
|                        | Time to complete reported             | Yes plus time to record, no, not specified                                                           |
|                        | Validation studies done               | Yes and method used, no, not specified                                                               |

<sup>1</sup> Data extraction was also done to assess cost and whether data security was mentioned, but few tools reported on these attributes, so they were not included in the final assessment.

**Table S3.** Validation methods for total energy and macronutrients for the technology-based tools used in dietary intake assessment

| Tool name                                                                                                                          | Type     | Validation Method                                | Subjects                                           | Energy                                                                                                                               | Significance Level                 | Protein, Fat, Carbohydrate | References                  |
|------------------------------------------------------------------------------------------------------------------------------------|----------|--------------------------------------------------|----------------------------------------------------|--------------------------------------------------------------------------------------------------------------------------------------|------------------------------------|----------------------------|-----------------------------|
| <b>Comparison of Estimated Energy Intakes from Technology Tools with Total Energy Expenditure (TEE) from DLW or Accelerometers</b> |          |                                                  |                                                    |                                                                                                                                      |                                    |                            |                             |
| FoodNow                                                                                                                            | Research | TEE estimated from accelerometer                 | 56 young adult men and women                       | 10,030 ± 2210 kJ/d (TEE) v. 9204 ± 1958 kJ/d (FoodNow)                                                                               | not reported                       |                            | Pendergrast et al. 2017 [1] |
| Microsoft SenseCam                                                                                                                 | Research | TEE by DLW compared to 24-h recall plus SenseCam | 20 men age 34.8 ± 12.6 y                           | 14,485 ± 2632 kJ/d (TEE) v. 13,196 ± 2529 kJ/d (SenseCam + recall)                                                                   | <i>P</i> = 0.02                    |                            | Gemming et al. 2015 [2]     |
|                                                                                                                                    |          |                                                  | 20 women age 27.1 ± 7.5 y                          | 10,841 ± 1639 kJ/d (TEE) v. 10,091 ± 1672 kJ/d (SenseCam + recall)                                                                   | <i>P</i> = 0.004                   |                            | Gemming 2015 et al. [2]     |
| NuDAM                                                                                                                              | Research | TEE by DLW                                       | 10 men and women with Type 2 diabetes, 48-69 y old | 11,800 ± 2300 kJ/d (TEE) v. 8800 ± 2000 kJ/d (Nutricam)                                                                              | <i>P</i> < 0.01                    |                            | Rollo et al. 2015 [3]       |
| RFPM                                                                                                                               | Research | TEE by DLW                                       | 9 men and 31 women                                 | 10,314 ± 2330 kJ/d (TEE) v. 6569 ± 2261 (RFPM standard prompts, n=22)); 9109 ± 2054 (TEE) v. 7979 ± 2243 (RFPM custom prompts, n=13) | <i>P</i> < .001<br><i>P</i> = 0.22 |                            | Martin et al. 2012 [4]      |
|                                                                                                                                    |          | TEE by DLW                                       | 6 men, 44 women                                    | 9874 ± 2619 (TEE free-living) v. 9238 ± 2782 (RFPM)                                                                                  | <i>P</i> = 0.16                    |                            | Martin et al. 2012 [4]      |

|       |          |                                                                          |                               |                                                                                |                                       |                                 |
|-------|----------|--------------------------------------------------------------------------|-------------------------------|--------------------------------------------------------------------------------|---------------------------------------|---------------------------------|
| TADA  | Research | TEE by DLW, estimated by image review and from returned portions         | 15 men age 32 ± 9 y           | Men: 14,846 kJ/d (TEE) v. 11,279 (image review) and 11,036 (returned portions) | <i>P</i> < 0.0001 TEE v. image review | Boushey et al. 2017 [5]         |
|       |          |                                                                          | 30 women age 33 ± 13 y        | Women: 10,995 kJ/d (TEE) v. 9136 (image review) and 9131 (returned portions)   | <i>P</i> < 0.0001 v. image review     | Boushey et al. 2017 [5]         |
| TECH  | Research | TEE by DLW                                                               | 30 Swedish children age 3 y   | 5070 ± 600 kJ/24H (TEE) v. 5400 ± 1500 kJ/24h (TECH)                           | <i>P</i> = 0.23                       | Henriksson et al. 2015 [6]      |
|       |          | TEE by DLW and 24-h recall                                               | 39 Swedish children 5.5 ± 5 y | 5820 ± 820 kJ/d (TEE) v. 6040 ± 680 kJ/d (TECH)                                | <i>P</i> = 0.06                       | Delisle Nystrom et al. 2016 [7] |
| WebFR | Research | TEE estimated from accelerometer data combined with child weight and sex | 253 children ages 8-14 y      | 8690 ± 1310 kJ/d (TEE) v. 6850 ± 2130 kJ/d WebFR                               | not reported                          | Medin et al. 2017 [8]           |

**Comparisons of Estimated Energy Intakes from Technology Tools with Diet Recalls, Diet Records, or Controlled Feeding Studies**

|        |          |                  |                        |                                                 |              |                                                                               |                          |
|--------|----------|------------------|------------------------|-------------------------------------------------|--------------|-------------------------------------------------------------------------------|--------------------------|
| ASA 24 | Research | Two 24-h recalls | 512 men ages 20-70 y   | 10,153 kJ/d (24-h recall) v. 9939 kJ/d (ASA 24) | not reported | Intakes with 24-h recall v. ASA 24<br>Protein +3.3g<br>Fat -3.2g<br>CHO +6.0g | Thompson et al. 2015 [9] |
|        |          |                  | 569 women ages 20-70 y | 7854 kJ/d (24-h recall) v. 7980 kJ/d (ASA 24)   | not reported | Intakes with 24-h recall v. ASA 24<br>Protein +4.0g<br>Fat +7.3g<br>CHO +3.3g | Thompson et al. 2015 [9] |

|             |          |                              |                                        |                                                                  |                             |                                                                                    |                                     |
|-------------|----------|------------------------------|----------------------------------------|------------------------------------------------------------------|-----------------------------|------------------------------------------------------------------------------------|-------------------------------------|
| Compl-Eat   | Research | Three 24-h recalls           | 514 men and women ages 20-70 y         | 8728 ± 1947 kJ/d (24-h recall) v. 8014 ± 2122 kJ/d (Compl-Eat)   | $P < 0.0001$                | Intakes with 24-h recalls v. Compl-Eat<br>Protein +7.4g<br>Fat +9.1g<br>CHO +13.0g | Meijboom et al. 2017 [10]           |
| e-CA        | Research | Two 24-h recalls             | 18 men and women ages 20-60 y          | 9998 ± 2780 kJ/d (24-h recalls) v. 9575 ± 3316 kJ/d (e-CA)       | Not statistically different | Intakes with 24-h recalls v. e-CA<br>Protein -2g<br>Fat +9g<br>CHO 0g              | Bucher Della Torre et al. 2017 [11] |
| eDIA        | Research | Three 24-h recalls           | 80 university students ages 19-24 y    | 8182 ± 2575 kJ/d (24-h recalls) v. 8148 ± 2495 kJ/d (eDIA)       | not reported                | Intakes with 24-h recalls v. eDIA<br>Protein +2.6 g<br>Fat +1.4g<br>CHO -22.3g     | Rangan et al. 2015 [12]             |
| Food4Me     | Research | Four-day weighed food record | 49 males and females, age 26.9 ± 8.4 y | 8110 ± 2119 kJ/d (WFR) v. 8855 ± 3387 kJ/d (Food4Me)             | $P = 0.008$                 | Intakes with WFR v. Food4Me:<br>Protein -0.4g<br>Fat -11.0g<br>CHO -10.0g          | Fallaise et al. 2014 [13]           |
| Foodbook 24 | Research | 24-h recall                  | 79 men and women age 33.2 ± 12.5 y     | 8453 ± 2675 kJ/d (24-h recall) v. 7607 ± 2805 kJ/d (Foodbook 24) | not reported                | Intakes with 24-h recall v. Foodbook 24<br>Protein +7g<br>Fat +11g<br>CHO +17g     | Timon et al. 2017 [14]              |

|            |          |                   |                                      |                                                                                                                                              |              |                                                                                    |                          |
|------------|----------|-------------------|--------------------------------------|----------------------------------------------------------------------------------------------------------------------------------------------|--------------|------------------------------------------------------------------------------------|--------------------------|
| GraFFS     | Research | Six 24-h recalls  | 74 men and women ages 18-69 y        | 8235 (CI 5334-12,606) kJ/d (24-h recalls) v. 7201 (CI 3542-14,645) kJ/d (GraFFS)                                                             | $P < 0.02$   | Intakes with 24-h recalls v. GraFFS<br>Protein +13.1g<br>Fat +11.5g<br>CHO +20.9g  | Kristal et al. 2014 [15] |
| IDQC       | Consumer | 3-d food diary    | 644 male and female college students | 8545 kJ/d (Diary) v. 9412 kJ/d (IDQC)                                                                                                        | $P < 0.05$   | Intakes with 3-d diary v. IDQC<br>Protein -9.0g<br>CHO -21.2g                      | Du et al. 2015 [16]      |
| Intake24   | Research | Four 24-h recalls | 52 boys and girls ages 11-16 y       | 6824 kJ/d (24-h recalls) v. 6682 kJ/d (Intake24)                                                                                             | not reported | Intakes with 24-h recalls vs. Intake24<br>Protein 0.0g<br>Fat +3.5g<br>CHO +1.8g   | Bradley et al. 2016 [17] |
|            |          | Four 24-h recalls | 116 boys and girls ages 17-24 y      | 7516 kJ/d (24-h recalls) v. 7408 kJ/d (Intake24)                                                                                             | not reported | Intakes with 24-h recalls vs. Intake24<br>Protein -1.3g<br>Fat -0.4g<br>CHO +1.2g  | Bradley et al. 2016 [17] |
| My Food 24 | Research | Two 24-h recalls  | 75 adolescents, ages 11-18 y         | Day 1: 8745 ± 3814 kJ/d (24-h recall) v. 8514 ± 4020 kJ/d (MyFood24)<br>Day 2: 8035 ± 2561 kJ/d (24-h recall) v. 7820 ± 2746 kJ/d (MyFood24) | $P = 0.40$   | Intakes with 24-h recalls v. MyFood24:<br>Protein +1.2g<br>Fat +2.9g<br>CHO +11.1g | Albar et al. 2016 [18]   |



|            |          |                      |                                                    |                                                                                      |                 |                                                                    |                         |
|------------|----------|----------------------|----------------------------------------------------|--------------------------------------------------------------------------------------|-----------------|--------------------------------------------------------------------|-------------------------|
| MyMealMate | Consumer | Two 24-h recalls     | 50 men and women, ages 35 ± 9 y                    | 8401 ± 2050 (24-h recalls) v. 8196 ± 2146 kJ/d (MMM)                                 | $P = 0.23$      | 24-h recalls v. MyMealMate: Protein +2.5g Fat +3.0g CHO +5.0g      | Carter et al. 2013 [19] |
|            |          |                      | 50 men and women, ages 35 ± 9 y                    | 8242 ± 1686 (24-h recalls) v. 8020 ± 1695 kJ/d (MMM)                                 | $P = 0.30$      |                                                                    | Carter et al. 2013 [19] |
| NANA       | Research | Four-day food diary  | 40 adults ages 65-89 y                             | 7348 ± 1503 kJ/d (Diary) v. 7098 ± 1382 kJ/d (NANA)                                  | $P = 0.048$     | Intakes with Food Diary v. NANA: Protein +3g Fat -1g CHO +7g       | Astell et al. 2014 [20] |
|            |          |                      | 94 adults ages 65-89 y                             | 7709 ± 177 kJ/d (Diary) v. 7461 ± 158 (NANA)                                         | $P = 0.004$     | Intakes with Food Diary v. NANA: Protein +3.7g Fat -0.9g CHO +5.2g | Timon et al. 2015 [21]  |
| NuDAM      | Research | 3-d food diary       | 10 men and women with Type 2 diabetes, 59-70 y old | 6946 ± 1837 (food diary) v. 6297 ± 1964 kJ/d (NuDAM)                                 | $P \leq 0.05$   |                                                                    | Rollo et al. 2011 [22]  |
|            |          | Weighed food records | 10 men and women with Type 2 diabetes, 48-69 y old | 8800 ± 1800 kJ/d (WFR) v. 8800 ± 2000 kJ/d (NuDAM) – part of same study as DLW above | not significant | WFR v. Nutricam Protein -4.7g Fat -1.2g CHO +1.1g                  | Rollo et al. 2015 [3]   |

|                   |          |                             |                                 |                                                                      |                                        |                                                                                       |                            |
|-------------------|----------|-----------------------------|---------------------------------|----------------------------------------------------------------------|----------------------------------------|---------------------------------------------------------------------------------------|----------------------------|
| Nutrinet<br>Santé | Research | One 24-h recall             | 60 men ages 48-75 y             | 8993 ± 2286 kJ/d (24-h recall) v. 8848 ± 2583 kJ/d (Nutrinet Santé)  | not reported                           | Intakes with 24-h recall v. Nutrinet Santé<br>Protein -2.2g<br>Fat +5.0g<br>CHO -3.3g | Touvier et al. 2011 [23]   |
|                   |          |                             | 87 women ages 48-75 y           | 7182 ± 2080 kJ/d (24-h recall) v. 7204 ± 2467 kJ/d (Nutrinet Santé)  | not reported                           | Intakes with 24-h recall v. Nutrinet Santé<br>Protein -1.0<br>Fat +1.7<br>CHO -4.2g   | Touvier et al. 2011 [23]   |
| Oxford WebQ       | Research | One 24-h recall             | 116 men and women, ages 19-82 y | 8702 ± 2600 kJ/d (24-h recall) v. 8713 ± 2463 kJ/d (Oxford WebQ)     | not reported                           | Intakes with 24-h recalls v. Oxford WebQ:<br>Protein +1.0g<br>Fat -3.5g<br>CHO +5.4g  | Liu et al. 2011 [24]       |
| R24W              | Research | Two days controlled feeding | 62 men and women ages 18-75 y   | 11,624 ± 2528 kJ/d (controlled feeding) v. 11,566 ± 3270 kJ/d (R24W) | Not significant at $P \leq 0.05$ level | Intakes with controlled feeding v. R24W<br>Protein -0.9g<br>Fat -8.2g<br>CHO +26.0g   | Lafenière et al. 2017 [25] |
| RFPM              | Research | Weighed buffet meal         | 49 men and women                | 2456 ± 874 kJ/d (weighed buffet) v. 2439 ± 795 kJ/d (RFPM)           | $P = 0.67$                             | Intakes from weighed buffet vs. RFPM<br>Protein -1.5g<br>Fat 0.8g<br>CHO -4.3g        | Martin et al., 2012 [4]    |

|         |          |                |                                    |                                                         |                 |                                                                              |                                 |
|---------|----------|----------------|------------------------------------|---------------------------------------------------------|-----------------|------------------------------------------------------------------------------|---------------------------------|
| TECH    | Research | 24-h recall    | 39 Swedish children 5.5 ± 5 y      | 5990 ± 680 kJ/d (24-h recall) v. 6040 ± 680 kJ/d (TECH) | <i>P</i> = 0.60 |                                                                              | Delisle Nystrom et al. 2016 [7] |
| Web-FFQ | Research | 3-d food diary | 69 men and women age 37.1 ± 14.2 y | 9377 ± 2232 kJ/d (Diary) v. 9477 ± 2941 kJ/d (Web-FFQ)  | <i>P</i> = 0.76 | Intakes with 3-d diary v. Web-FFQ<br>Protein +1.3g<br>Fat -2.4g<br>CHO -5.3g | Labonte et al. 2012 [26]        |

References for Supplementary Materials (all also appear in the references for the main text, but with different numbering)

1. Pendergast, F.J.; Ridgers, N.D.; Worsley, A.; McNaughton, S.A. Evaluation of a smartphone food diary application using objectively measured energy expenditure. *Int J Behav Nutr Phys Act* **2017**, *14*, 30, doi:10.1186/s12966-017-0488-9.
2. Gemming, L.; Rush, E.; Maddison, R.; Doherty, A.; Gant, N.; Utter, J.; Ni Mhurchu, C. Wearable cameras can reduce dietary under-reporting: doubly labelled water validation of a camera-assisted 24 h recall. *Br J Nutr* **2015**, *113*, 284-291, doi:10.1017/S0007114514003602.
3. Rollo, M.E.; Ash, S.; Lyons-Wall, P.; Russell, A.W. Evaluation of a mobile phone image-based dietary assessment method in adults with Type 2 Diabetes. *Nutrients* **2015**, *7*, 4897-4910, doi:10.3390/nu7064897.
4. Martin, C.K.; Correa, J.B.; Han, H.; Allen, H.R.; Rood, J.C.; Champagne, C.M.; Gunturk, B.K.; Bray, G.A. Validity of the Remote Food Photography Method (RFPM) for estimating energy and nutrient intake in near real-time. *Obesity (Silver Spring)* **2012**, *20*, 891-899, doi:10.1038/oby.2011.344.
5. Boushey, C.J.; Spoden, M.; Delp, E.J.; Zhu, F.; Bosch, M.; Ahmad, Z.; Shvetsov, Y.B.; DeLany, J.P.; Kerr, D.A. Reported energy intake accuracy compared to doubly labeled water and usability of the Mobile Food Record among community dwelling adults. *Nutrients* **2017**, *9*, doi:10.3390/nu9030312.
6. Henriksson, H.; Bonn, S.E.; Bergstrom, A.; Balter, K.; Balter, O.; Delisle, C.; Forsum, E.; Lof, M. A new mobile phone-based tool for assessing energy and certain food intakes in young children: a validation study. *JMIR Mhealth Uhealth* **2015**, *3*, e38, doi:10.2196/mhealth.3670.
7. Delisle Nystrom, C.; Forsum, E.; Henriksson, H.; Trolle-Lagerros, Y.; Larsson, C.; Maddison, R.; Timpka, T.; Lof, M. A mobile phone based method to assess energy and food intake in young children: a validation study against the doubly labelled water method and 24 h dietary recalls. *Nutrients* **2016**, *8*, doi:10.3390/nu8010050.
8. Medin, A.C.; Hansen, B.H.; Astrup, H.; Ekelund, U.; Frost Andersen, L. Validation of energy intake from a web-based food recall for children and adolescents. *PLoS One* **2017**, *12*, e0178921, doi:10.1371/journal.pone.0178921.
9. Thompson, F.E.; Dixit-Joshi, S.; Potischman, N.; Dodd, K.W.; Kirkpatrick, S.I.; Kushi, L.H.; Alexander, G.L.; Coleman, L.A.; Zimmerman, T.P.; Sundaram, M.E., et al. Comparison of interviewer-administered and automated self-administered 24-hour dietary recalls in 3 diverse integrated health systems. *Am J Epidemiol* **2015**, *181*, 970-978, doi:10.1093/aje/kwu467.

10. Meijboom, S.; van Houts-Streppel, M.T.; Perenboom, C.; Siebelink, E.; van de Wiel, A.M.; Geelen, A.; Feskens, E.J.M.; de Vries, J.H.M. Evaluation of dietary intake assessed by the Dutch self-administered web-based dietary 24-h recall tool (Compl-eat) against interviewer-administered telephone-based 24-h recalls. *J Nutr Sci* **2017**, *6*, e49, doi:10.1017/jns.2017.45.
11. Bucher Della Torre, S.; Carrard, I.; Farina, E.; Danuser, B.; Kruseman, M. Development and evaluation of e-CA, an electronic mobile-based food record. *Nutrients* **2017**, *9*, doi:10.3390/nu9010076.
12. Rangan, A.M.; O'Connor, S.; Giannelli, V.; Yap, M.L.; Tang, L.M.; Roy, R.; Louie, J.C.; Hebden, L.; Kay, J.; Allman-Farinelli, M. Electronic Dietary Intake Assessment (e-DIA): comparison of a mobile phone digital entry app for dietary data collection with 24-hour dietary recalls. *JMIR Mhealth Uhealth* **2015**, *3*, e98, doi:10.2196/mhealth.4613.
13. Fallaize, R.; Forster, H.; Mcready, A.L.; Walsh, M.C.; Mathers, J.C.; Brennan, L.; Gibney, E.R.; Gibney, M.J.; Lovegrove, J.A. Online dietary intake estimation: reproducibility and validity of the Food4Me food frequency questionnaire against a 4-day weighed food record. *J Med Internet Res* **2014**, *16*, e190, doi:10.2196/jmir.3355.
14. Timon, C.M.; Evans, K.; Kehoe, L.; Blain, R.J.; Flynn, A.; Gibney, E.R.; Walton, J. Comparison of a Web-based 24-h dietary recall tool (Foodbook24) to an interviewer-led 24-h dietary recall. *Nutrients* **2017**, *9*, doi:10.3390/nu9050425.
15. Kristal, A.R.; Kolar, A.S.; Fisher, J.L.; Plascak, J.J.; Stumbo, P.J.; Weiss, R.; Paskett, E.D. Evaluation of web-based, self-administered, graphical food frequency questionnaire. *J Acad Nutr Diet* **2014**, *114*, 613-621, doi:10.1016/j.jand.2013.11.017.
16. Du, S.S.; Jiang, Y.S.; Chen, Y.; Li, Z.; Zhang, Y.F.; Sun, C.H.; Feng, R.N. Development and applicability of an internet-based diet and lifestyle questionnaire for college students in China: a cross-sectional study. *Medicine (Baltimore)* **2015**, *94*, e2130, doi:10.1097/MD.0000000000002130.
17. Bradley, J.; Simpson, E.; Poliakov, I.; Matthews, J.N.; Olivier, P.; Adamson, A.J.; Foster, E. Comparison of INTAKE24 (an online 24-h dietary recall tool) with interviewer-led 24-h recall in 11-24 year-old. *Nutrients* **2016**, *8*, doi:10.3390/nu8060358.
18. Albar, S.A.; Alwan, N.A.; Evans, C.E.; Greenwood, D.C.; Cade, J.E. Agreement between an online dietary assessment tool (myfood24) and an interviewer-administered 24-h dietary recall in British adolescents aged 11-18 years. *Br J Nutr* **2016**, *115*, 1678-1686, doi:10.1017/S0007114516000593.
19. Carter, M.C.; Burley, V.J.; Nykjaer, C.; Cade, J.E. 'My Meal Mate' (MMM): validation of the diet measures captured on a smartphone application to facilitate weight loss. *Br J Nutr* **2013**, *109*, 539-546, doi:10.1017/S0007114512001353.
20. Astell, A.J.; Hwang, F.; Brown, L.J.; Timon, C.; Maclean, L.M.; Smith, T.; Adlam, T.; Khadra, H.; Williams, E.A. Validation of the NANA (Novel Assessment of Nutrition and Ageing) touch screen system for use at home by older adults. *Exp Gerontol* **2014**, *60*, 100-107, doi:10.1016/j.exger.2014.10.008.
21. Timon, C.M.; Astell, A.J.; Hwang, F.; Adlam, T.D.; Smith, T.; Maclean, L.; Spurr, D.; Forster, S.E.; Williams, E.A. The validation of a computer-based food record for older adults: the Novel Assessment of Nutrition and Ageing (NANA) method. *Br J Nutr* **2015**, *113*, 654-664, doi:10.1017/S0007114514003808.
22. Rollo, M.E.; Ash, S.; Lyons-Wall, P.; Russell, A. Trial of a mobile phone method for recording dietary intake in adults with type 2 diabetes: evaluation and implications for future applications. *J Telemed Telecare* **2011**, *17*, 318-323, doi:10.1258/jtt.2011.100906.

23. Touvier, M.; Kesse-Guyot, E.; Mejean, C.; Pollet, C.; Malon, A.; Castetbon, K.; Hercberg, S. Comparison between an interactive web-based self-administered 24 h dietary record and an interview by a dietitian for large-scale epidemiological studies. *Br J Nutr* **2011**, *105*, 1055-1064, doi:10.1017/S0007114510004617.
24. Liu, B.; Young, H.; Crowe, F.L.; Benson, V.S.; Spencer, E.A.; Key, T.J.; Appleby, P.N.; Beral, V. Development and evaluation of the Oxford WebQ, a low-cost, web-based method for assessment of previous 24 h dietary intakes in large-scale prospective studies. *Public Health Nutr* **2011**, *14*, 1998-2005, doi:10.1017/S1368980011000942.
25. Lafrenière, J.; Benoît Lamarche, B.; Catherine Laramée, C.; Julie Robitaille, J.; Lemieux, S. Validation of a newly automated webbased 24-hour dietary recall using fully controlled feeding studies. *BMC Nutr.* **2017**, *3*, doi:DOI 10.1186/s40795-017-0153-3.
26. Labonte, M.E.; Cyr, A.; Baril-Gravel, L.; Royer, M.M.; Lamarche, B. Validity and reproducibility of a web-based, self-administered food frequency questionnaire. *Eur J Clin Nutr* **2012**, *66*, 166-173, doi:10.1038/ejcn.2011.163.
